# Supplementary material for: The Effect of Block Ratio and Structure on the Thermosensitivity of Double and Triple Betaine Block Copolymers
Source: MDPI journal article supplement (doi:10.3390/molecules29020390), 2024-01-12
Supplement: s1 [file s1]

## Effect of Block Ratio and Structure on the Thermosensitivity of Double and Triple Betaine Block Copolymers

*Jongmin Lim<sup>§</sup>, Hideki Matsuoka<sup>§\*</sup>, Yusuke Kinoshita<sup>†</sup>, Shin-ichi Yusa<sup>†</sup>, and Yoshiyuki Saruwatari<sup>‡</sup>*

<sup>§</sup> Department of Polymer Chemistry, Kyoto University, Katsura, Nishikyo-ku, Kyoto 615-8510, Japan

<sup>†</sup> Department of Applied Chemistry, Graduate School of Engineering, University of Hyogo, 2167 Shosha, Himeji, Hyogo 671-2280, Japan

<sup>‡</sup> Osaka Organic Chemical Industry Ltd., 7-20 Azuchi-machi, 1chome, Chuo-ku, Osaka 541-0052, Japan

**Table S1.** Experimental conditions for the synthesis of PGLBT-*b*-PSPEs via RAFT polymerization in water at 70 °C (sum of DP<sub>target</sub>: 300)

| Sample                                   | GLBT <sub>149</sub> - <i>b</i> -SPE <sub>161</sub> |                        | GLBT <sub>100</sub> - <i>b</i> -SPE <sub>245</sub> |                        | GLBT <sub>74</sub> - <i>b</i> -SPE <sub>277</sub> |                        | GLBT <sub>49</sub> - <i>b</i> -SPE <sub>229</sub> |                        |
|------------------------------------------|----------------------------------------------------|------------------------|----------------------------------------------------|------------------------|---------------------------------------------------|------------------------|---------------------------------------------------|------------------------|
| Steps                                    | 1                                                  | 2                      | 1                                                  | 2                      | 1                                                 | 2                      | 1                                                 | 2                      |
| Monomer                                  | GLBT                                               | SPE                    | GLBT                                               | SPE                    | GLBT                                              | SPE                    | GLBT                                              | SPE                    |
| DP <sub>target</sub>                     | 150                                                | 150                    | 100                                                | 200                    | 75                                                | 225                    | 50                                                | 250                    |
| m <sub>monomer</sub> (g)                 | 1.427                                              | 1.851                  | 0.951                                              | 2.469                  | 0.713                                             | 2.814                  | 0.476                                             | 3.086                  |
| m <sub>CTA</sub> (g)                     | 0.015                                              |                        | 0.015                                              |                        | 0.015                                             |                        | 0.015                                             |                        |
| m <sub>VA-044</sub> (g)                  | 0.7 × 10 <sup>-3</sup>                             | 0.7 × 10 <sup>-3</sup> | 0.7 × 10 <sup>-3</sup>                             | 0.7 × 10 <sup>-3</sup> | 0.7 × 10 <sup>-3</sup>                            | 0.7 × 10 <sup>-3</sup> | 0.7 × 10 <sup>-3</sup>                            | 0.7 × 10 <sup>-3</sup> |
| Reaction time (h)                        | 3                                                  | 3                      | 3                                                  | 3                      | 3                                                 | 3                      | 3                                                 | 3                      |
| V <sub>solvent</sub> (mL) <sup>[a]</sup> | 2.2                                                | 2.7                    | 1.7                                                | 4.2                    | 1.3                                               | 4                      | 0.75                                              | 4.25                   |
| [M] <sub>0</sub> (mol/L)                 | 3.01                                               | 2.45                   | 2.60                                               | 2.10                   | 2.55                                              | 2.52                   | 2.95                                              | 2.60                   |
| [CTA] <sub>0</sub> /[I] <sub>0</sub>     | 20                                                 | 20                     | 20                                                 | 20                     | 20                                                | 20                     | 20                                                | 20                     |
| Cumulative L (%)                         | 95.3                                               | 90.8                   | 95.3                                               | 90.8                   | 95.3                                              | 90.8                   | 95.3                                              | 90.8                   |

[a] is the sum of the volume of the solvent added in the first and the next step

**Table S2.** Experimental conditions for the synthesis of PGLBT-*b*-PSPEs via RAFT polymerization in water at 70 °C (sum of DP<sub>target</sub>: 600)

| Sample                                   | GLBT <sub>297</sub> - <i>b</i> -SPE <sub>330</sub> |                        | GLBT <sub>198</sub> - <i>b</i> -SPE <sub>811</sub> |                        | GLBT <sub>149</sub> - <i>b</i> -SPE <sub>742</sub> |                        | GLBT <sub>99</sub> - <i>b</i> -SPE <sub>630</sub> |                        |
|------------------------------------------|----------------------------------------------------|------------------------|----------------------------------------------------|------------------------|----------------------------------------------------|------------------------|---------------------------------------------------|------------------------|
| Steps                                    | 1                                                  | 2                      | 1                                                  | 2                      | 1                                                  | 2                      | 1                                                 | 2                      |
| Monomer                                  | GLBT                                               | SPE                    | GLBT                                               | SPE                    | GLBT                                               | SPE                    | GLBT                                              | SPE                    |
| DP <sub>target</sub>                     | 300                                                | 300                    | 200                                                | 400                    | 150                                                | 450                    | 100                                               | 500                    |
| m <sub>monomer</sub> (g)                 | 1.902                                              | 2.493                  | 1.268                                              | 3.292                  | 0.951                                              | 3.703                  | 0.634                                             | 3.086                  |
| m <sub>CTA</sub> (g)                     | 0.01                                               |                        | 0.01                                               |                        | 0.01                                               |                        | 0.01                                              |                        |
| m <sub>VA-044</sub> (g)                  | 0.5 x 10 <sup>-3</sup>                             | 0.7 x 10 <sup>-3</sup> | 0.5 x 10 <sup>-3</sup>                             | 1.0 x 10 <sup>-3</sup> | 0.5 x 10 <sup>-3</sup>                             | 1.0 x 10 <sup>-3</sup> | 0.5 x 10 <sup>-3</sup>                            | 1.0 x 10 <sup>-3</sup> |
| Reaction time (h)                        | 6                                                  | 6                      | 6                                                  | 6                      | 6                                                  | 6                      | 6                                                 | 6                      |
| V <sub>solvent</sub> (mL) <sup>[a]</sup> | 2.80                                               | 3.50                   | 1.70                                               | 4.60                   | 1.20                                               | 4.50                   | 1.00                                              | 7.00                   |
| [M] <sub>0</sub> (mol/L)                 | 3.16                                               | 2.55                   | 3.46                                               | 2.56                   | 3.68                                               | 2.95                   | 2.95                                              | 2.12                   |
| [CTA] <sub>0</sub> /[I] <sub>0</sub>     | 20                                                 | 14                     | 20                                                 | 10                     | 20                                                 | 10                     | 20                                                | 10                     |
| Cumulative L (%)                         | 95.3                                               | 90.8                   | 95.3                                               | 86.6                   | 95.3                                               | 86.6                   | 95.3                                              | 86.7                   |

**Table S3.** Experimental conditions for preparation of BAB-type PSPE-PGLBT-PSPEs via RAFT polymerization in water at 70 °C (sum of DP<sub>target</sub>: 600)

| Sample                                   | SPE <sub>198</sub> -GLBT <sub>198</sub> -SPE <sub>212</sub> |                        |                        | SPE <sub>248</sub> -GLBT <sub>99</sub> -SPE <sub>277</sub> |                        |                        |
|------------------------------------------|-------------------------------------------------------------|------------------------|------------------------|------------------------------------------------------------|------------------------|------------------------|
| Steps                                    | 1                                                           | 2                      | 3                      | 1                                                          | 2                      | 3                      |
| Monomer                                  | SPE                                                         | GLBT                   | SPE                    | SPE                                                        | GLBT                   | SPE                    |
| DP <sub>target</sub>                     | 200                                                         | 200                    | 200                    | 250                                                        | 100                    | 250                    |
| m <sub>monomer</sub> (g)                 | 2.304                                                       | 1.793                  | 2.337                  | 3.086                                                      | 0.959                  | 3.118                  |
| m <sub>CTA</sub> (g)                     | 0.014                                                       |                        |                        | 0.015                                                      |                        |                        |
| m <sub>VA-044</sub> (g)                  | 0.7 x 10 <sup>-3</sup>                                      | 0.7 x 10 <sup>-3</sup> | 0.9 x 10 <sup>-3</sup> | 0.7 x 10 <sup>-3</sup>                                     | 1.2 x 10 <sup>-3</sup> | 0.7 x 10 <sup>-3</sup> |
| Reaction time (h)                        | 3                                                           | 3                      | 3                      | 3                                                          | 3                      | 3                      |
| V <sub>solvent</sub> (mL) <sup>[a]</sup> | 2.70                                                        | 3.20                   | 4.20                   | 3.60                                                       | 4.10                   | 5.60                   |
| [M] <sub>0</sub> (mol/L)                 | 3.05                                                        | 2.60                   | 2.00                   | 3.07                                                       | 1.09                   | 1.99                   |
| [CTA] <sub>0</sub> /[I] <sub>0</sub>     | 20                                                          | 20                     | 14                     | 20                                                         | 12.5                   | 20                     |
| Cumulative L (%)                         | 95.3                                                        | 90.8                   | 84.9                   | 95.3                                                       | 88.3                   | 84.1                   |

## Details of DLS and SLS analysis

The normalized intensity autocorrelation function  $g^{(2)}(q,t)$  is measured by

$$g^{(2)}(q, t) = \frac{\langle I^*(q, 0)I(q, t) \rangle}{\langle I(q, 0)^2 \rangle} \quad (\text{S1})$$

Then,  $g^{(2)}(q,t)$  is related to the normalized electric field autocorrelation function  $g^{(1)}(q,t)$  by the Siegert relation (S1),

$$g^{(2)}(q, t) = 1 + \beta |g^{(1)}(q, t)|^2 \quad (\text{S2})$$

where  $\beta$  is a coherence factor depending on the experimental conditions, and  $g^{(1)}(q,t)$  is to be evaluated. For a polydisperse particle system, the  $g^{(1)}(q,t)$ s can be written as:

$$g^{(1)}(q, t) = \int_0^\infty G(\Gamma) \exp(-\Gamma t) d\Gamma \quad (\text{S3})$$

where  $G(\Gamma)$  is the intensity-based normalized distribution of decay rates  $\int G(\Gamma) d\Gamma = 1$  and able to be calculated through inverse Laplace transform. (CONTIN regularization was applied by a software, BIC Particle Explorer, Brookhaven Instruments) The translational diffusion coefficient  $D_t = \bar{\Gamma}/q^2$  was obtained from the slope of the decay rate  $\bar{\Gamma}$  versus  $q^2$ . The scattering vector  $q$  is

$$q = \frac{4\pi n}{\lambda} \sin\left(\frac{\theta}{2}\right) \quad (\text{S4})$$

where  $n$  is the refractive index of the water,  $\lambda$  is the wavelength of the incident laser (632.8 nm), and  $\theta$  is the scattering angle. The hydrodynamic radius  $R_h$  was obtained by the Stokes-Einstein equation:

$$R_h = \frac{k_B T}{6\pi\eta D_t} \quad (S5)$$

Where  $k_B$  is the Boltzmann constant,  $T$  is the absolute temperature, and  $\eta$  is the viscosity of solvent (water), respectively.

In the static light scattering (SLS) measurements, the scattering intensity were recorded over an angular range between  $40^\circ$  and  $150^\circ$  at  $10^\circ$  intervals. A partial Zimm equation (S5) of the inverse scattering intensity ( $1/I_{ex}$ ) versus the square of the scattering vector  $q^2$  at a single concentration was used to determine the radius of gyration ( $R_g$ ), as follows

$$\frac{1}{I_{ex}(q)} = C(1 + \frac{R_g^2 q^2}{3}) \quad (S6)$$

where  $C$  is the arbitrary constant, and  $I_{ex}(q)$  is the intensity of scattered light. Several points that were apparently discrepant from the overall results were exempted from the linear fitting.

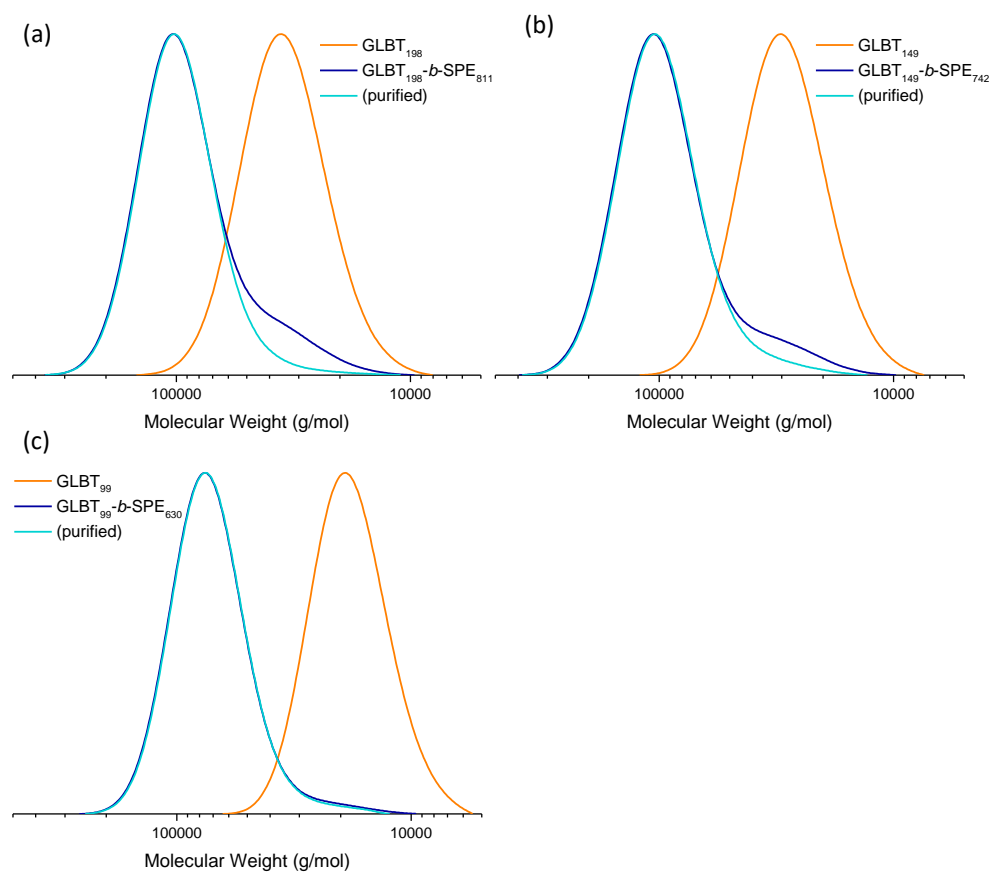

**Figure S1.** Molecular weight distributions of crude and purified PGLBT-*b*-PSPEs and PGLBTs as their macroCTAs (total DP<sub>target</sub>: 600) (a) GLBT<sub>198</sub>-*b*-SPE<sub>811</sub> (b) GLBT<sub>149</sub>-*b*-SPE<sub>742</sub> (c) GLBT<sub>99</sub>-*b*-SPE<sub>630</sub>

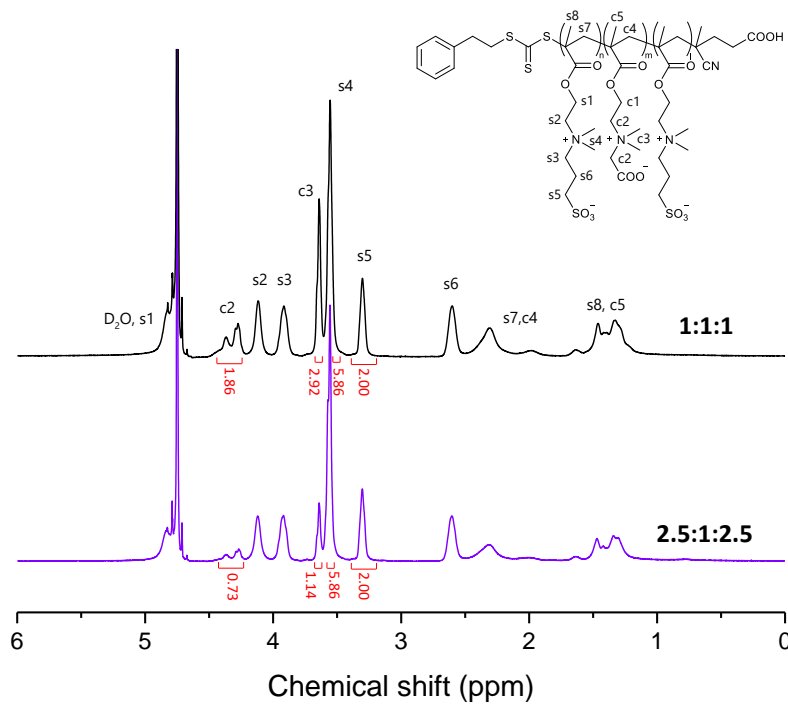

**Figure S2.**  $^1\text{H}$  NMR spectra of two triblocks in  $\text{D}_2\text{O}$  at  $60\text{ }^\circ\text{C}$ .  $\text{SPE}_{198}\text{-GLBT}_{198}\text{-SPE}_{212}$  (target ratio = 1:1:1, black line) and  $\text{SPE}_{248}\text{-GLBT}_{99}\text{-SPE}_{277}$  (target ratio = 2.5:1:2.5, blue line)

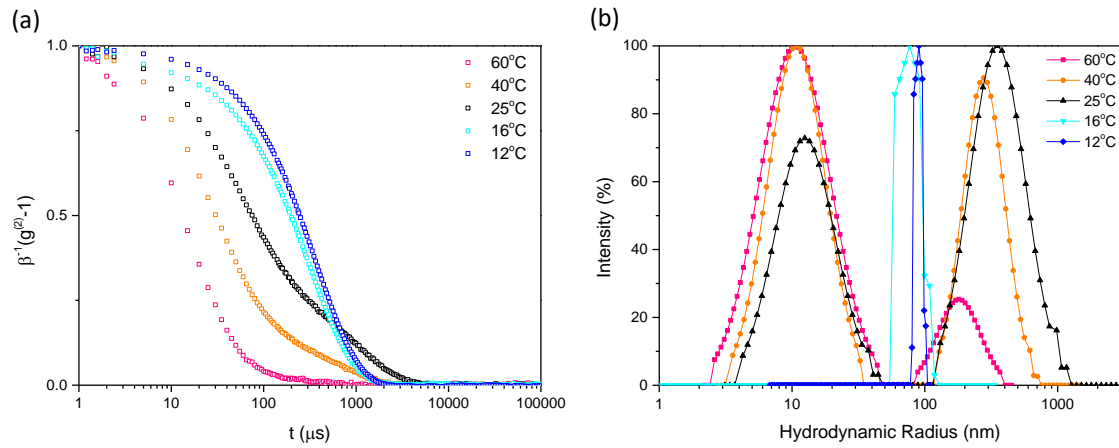

**Figure S3.** The autocorrelation functions of GLBT<sub>149</sub>-*b*-SPE<sub>742</sub> (a) and the size distributions (b) at 5 temperatures. (conc. = 10 mg/mL)

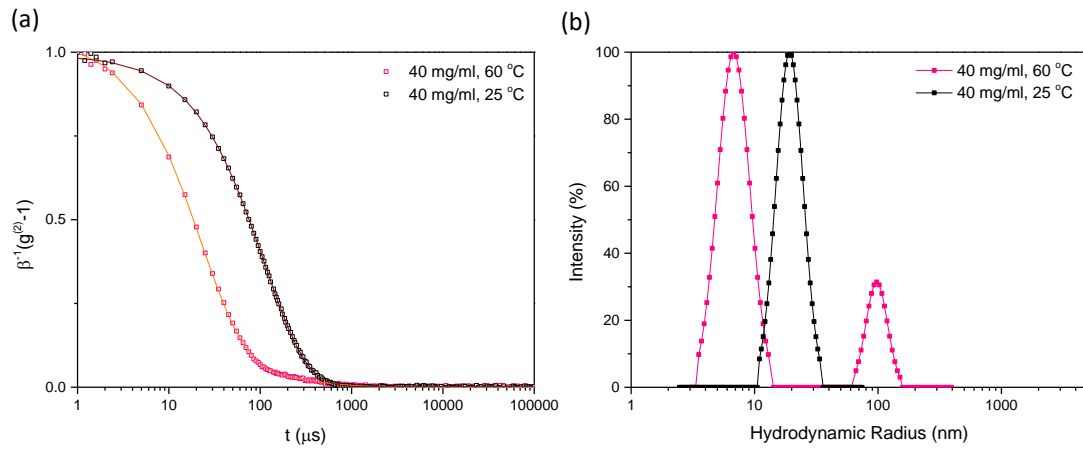

**Figure S4.** (a) ACFs and (b) the CONTIN analysis result of GLBT<sub>49</sub>-*b*-SPE<sub>229</sub> solution (conc. = 40 mg/mL) measured at 25 and 60 °C, respectively.

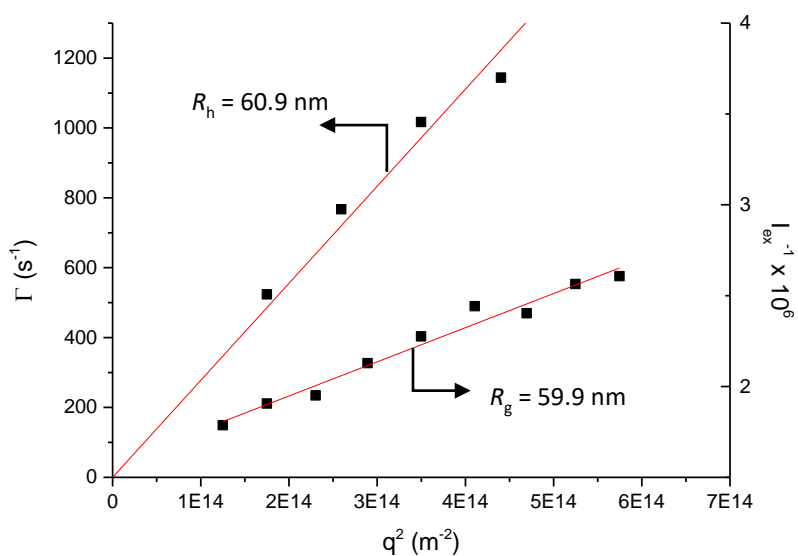

**Figure S5.** Angular dependent DLS and SLS measurements of (a) GLBT<sub>99</sub>-b-SPE<sub>630</sub> at 12 °C (conc. = 10 mg/mL)

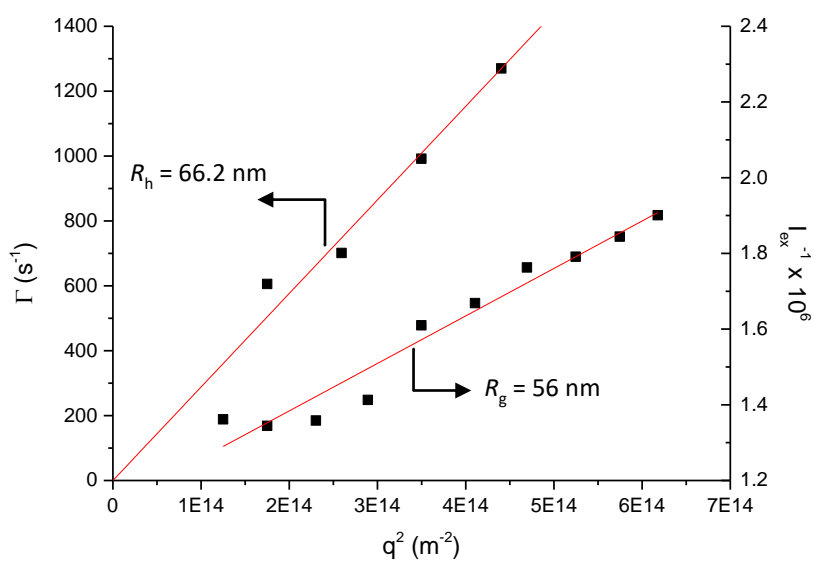

**Figure S6.** Angular dependent DLS and SLS measurements of (a) SPE<sub>248</sub>-GLBT<sub>99</sub>-SPE<sub>277</sub> at 16 °C (conc. = 2.5 mg/mL)



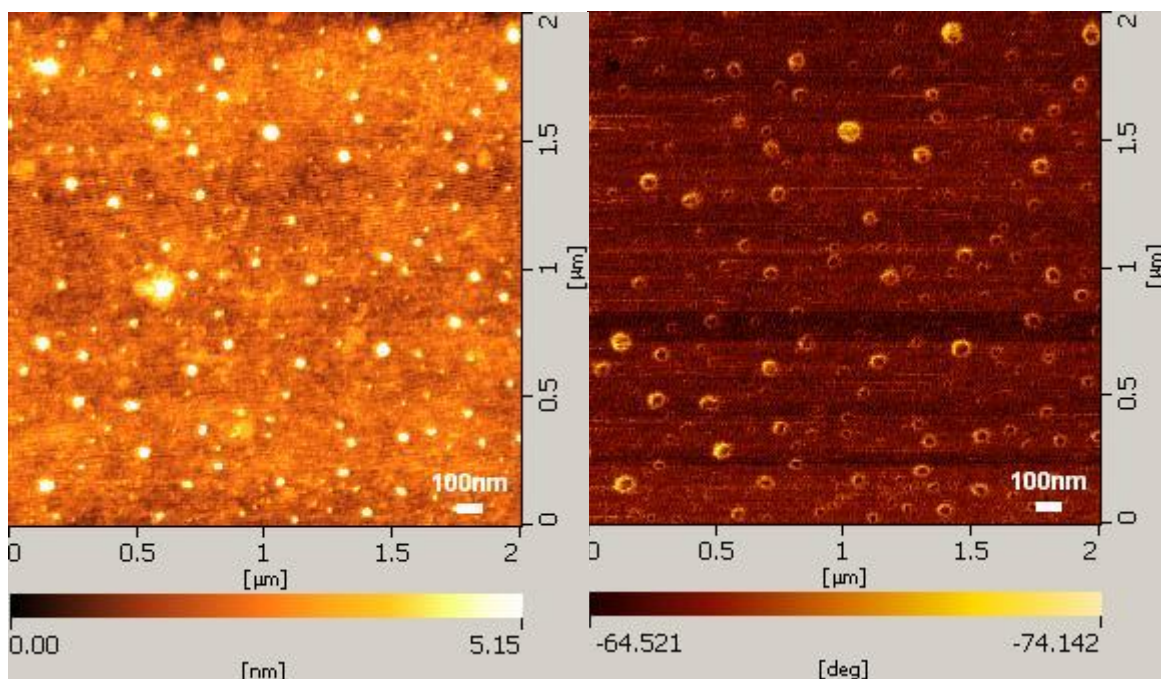

**Figure S7.** AFM image of GLBT<sub>198</sub>-*b*-SPE<sub>811</sub> (50 mg/mL) on a glass substrate (left: height mode, flattened, right: phase mode).

The AFM measurement was carried out under the following condition: A Seiko SPI3800 probe station and SPI300 unit system in dynamic force mode (non-contact mode) were operated with microcantilevers. (OMCL-AC240TS-C3, Olympus, typical resonance frequency: 70 kHz and typical spring constant: 1.7 N/m) For sample preparation, aqueous suspensions of colloidal PGLBT-*b*-PSPE particles were dropcast onto a microscope slide glass (IWAKI, Japan) and dried at room temperature more than three days.

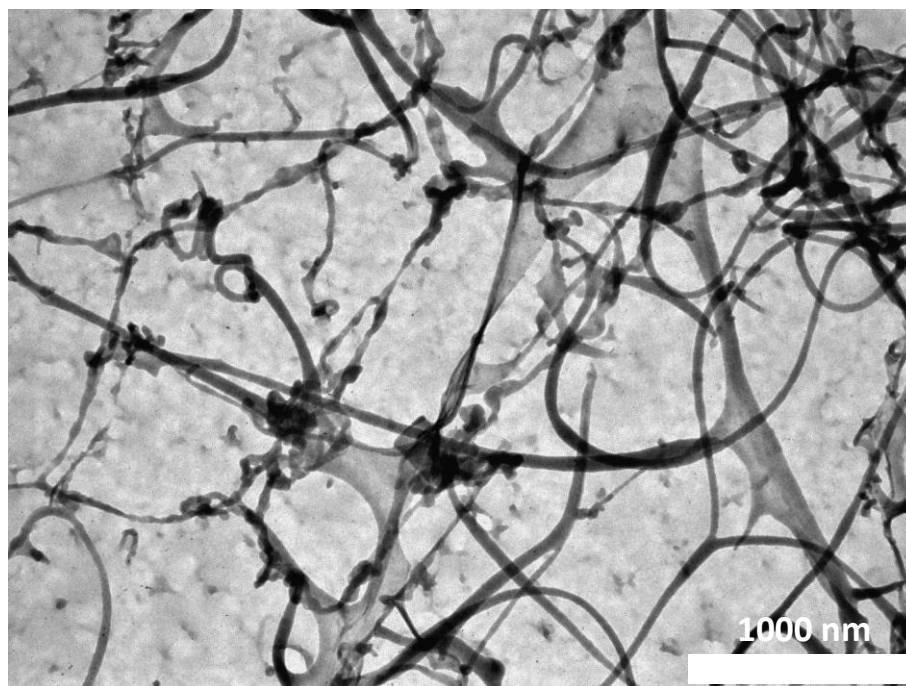

**Figure S8.** TEM image of GLBT<sub>99</sub>-*b*-SPE<sub>630</sub> obtained from the solution in the self-assembled state (conc. = 5 mg/mL)
